# Supplementary material for: Control of Foodborne Staphylococcus aureus by Shikonin, a Natural Extract
Source: MDPI journal article supplement (doi:10.3390/foods10122954), 2021-12-01
Supplement: s1 [file s1]

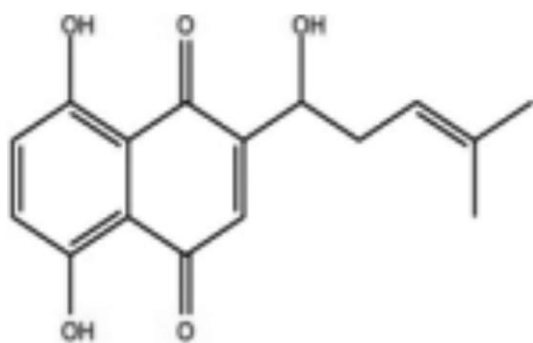

**Figure S1.** The chemical structure of shikonin.

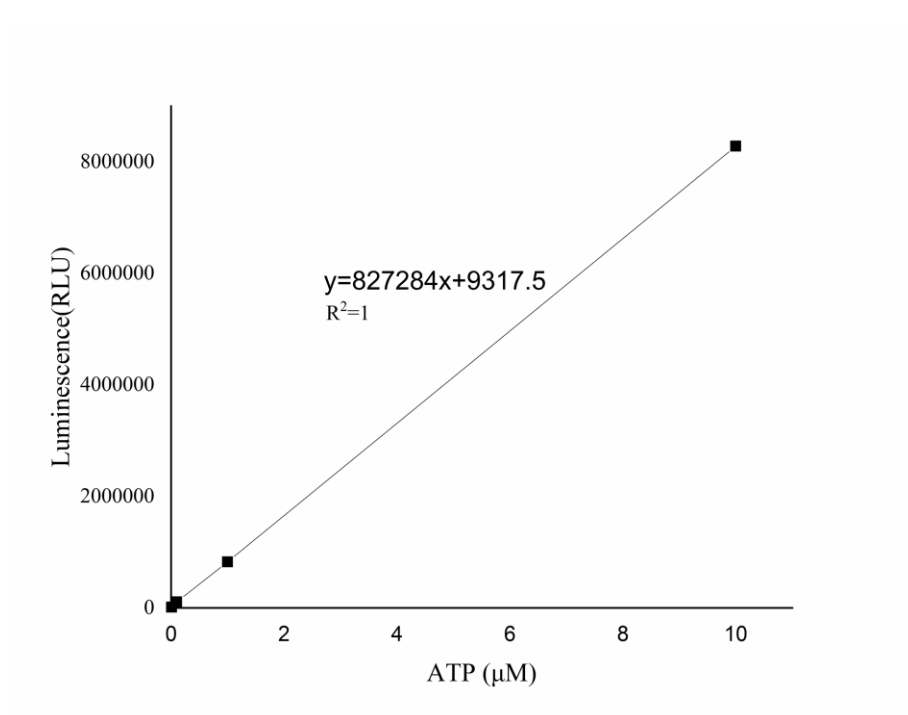

**Figure S2.** The linear relationship between ATP concentration and luminescence.

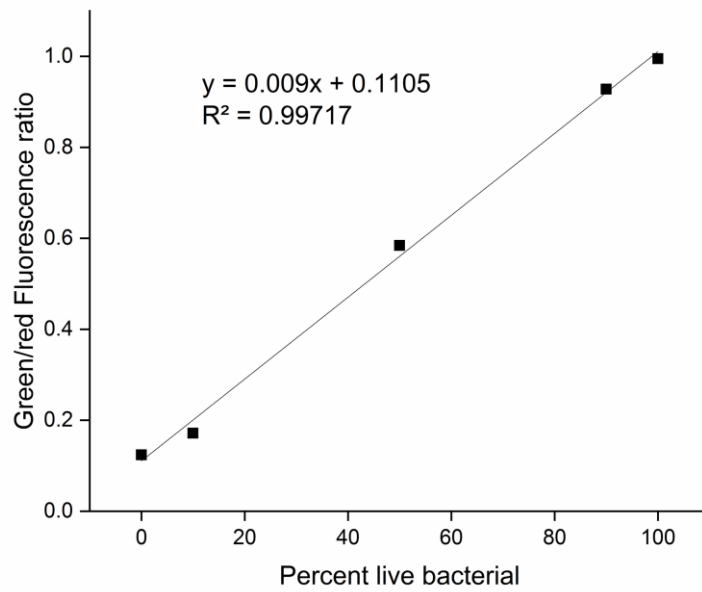

**Figure S3.** The linear relationship between the percentage of viable cells and the intensity of green fluorescence.

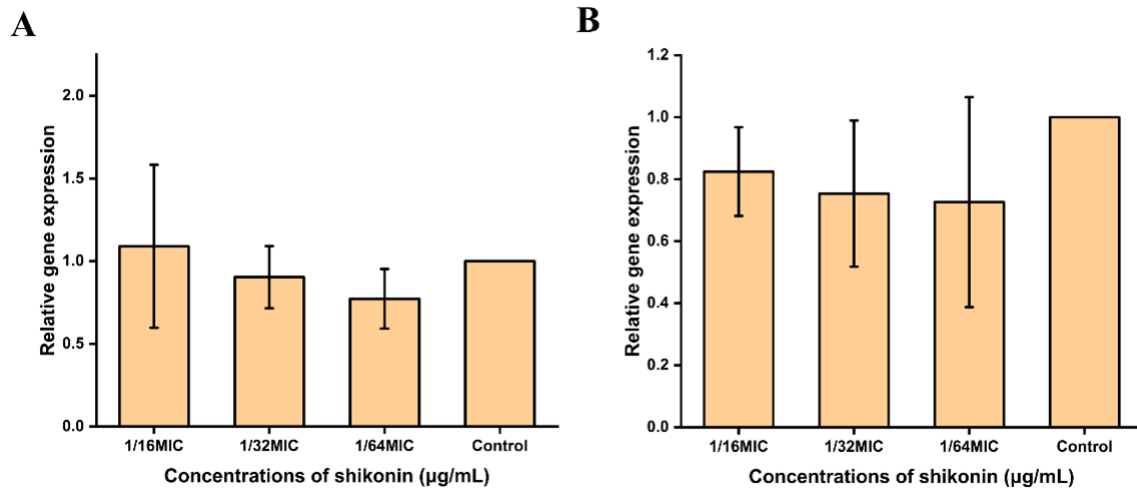

**Figure S4.** RT-qPCR quantitative gene transcription. (A) The gene transcription of *icaA* of strain ATCC29213 treated with shikonin; (B) The gene transcription of *agrA* of strain ATCC29213 treated with shikonin. \*\* $P < 0.01$ , \* $P < 0.05$ .
